# Supplementary material
Source: PubMed Central journal article supplement (PMC2751601)
Supplement: NIHMS130428-supplement-Supplementary_Data.pdf [file NIHMS130428-supplement-Supplementary_Data.pdf]

## **Supplementary Information**

### **IDENTIFICATION OF PATHOGENIC EPITOPES IN PAUCI-IMMUNE CRESCENTIC GLOMERULONEPHRITIS**

#### **Molecular Mimicry of Lysosomal Membrane Glycoprotein 2 (hLAMP-2) and the Bacterial Adhesin FimH**

Renate Kain, Markus Exner, Ricarda Brandes, Reinhard Ziebermayr, Dawn Cunningham, Carol A. Alderson, Agnes Davidovits, Ingrid Raab, Renate Jahn, Oliver Ashour, Susanne Spitzauer, Gere Sunder-Plaßmann, Minoru Fukuda, Per Klemm, Andrew J. Rees and Dentscho Kerjaschki

**Supplementary Figure 1: Characterization of antibodies to hLAMP-2**

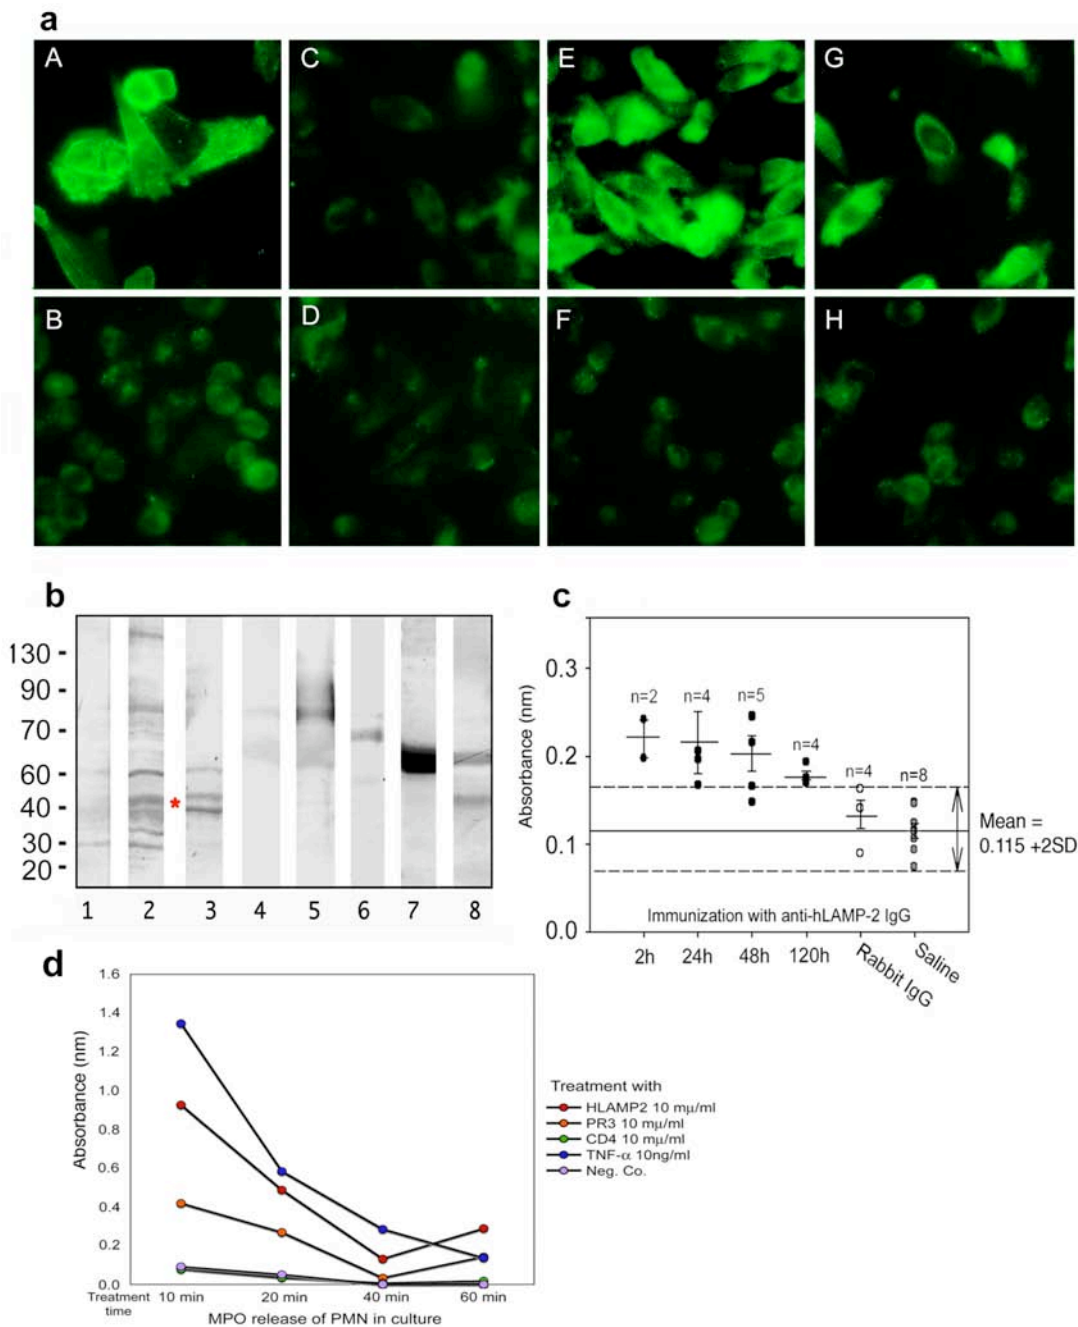

(a) Parental Id1D (B, F, H) and Id1D cells stably expressing hLAMP-2 on the cell surface (Id1D/hLAMP-2H - A, C, D, E, G) were probed with a rabbit antiserum to hLAMP-2 (A), human serum from a healthy volunteer (C), or sera from two anti-hLAMP-2 positive patients with pauci-immune FNGN (E-F, G-H). Patients' IgG from hLAMP-2 positive sera bound specifically to Id1D/hLAMP-2H but not parental Id1D cells while sera from controls failed to bind to both parental and transfected cells. Anti-rabbit and anti-human IgG conjugated to FITC alone were used as control (B, D). Representative samples of 18 patients tested are shown.

(b) Bacterial lysates and recombinant *E. coli* and mammalian expressed hLAMP-2 fusion proteins

were probed with a monoclonal antibody to hLAMP-2. Crude lysates of BL21/DE3 (lane 1) did not contain a band corresponding to the hLAMP-2 fusion protein that is visible in the BL21/DE3h2sol cell lysate (lane 2) or with purified His-tagged hLAMP-2 (lane 3). Supernatants from CHO cells that express soluble hLAMP-2 was used in ELISA experiments either untreated (lane 5) and treated with PNGaseF to remove *N*-glycans (lane 6). Supernatant from untransfected CHO cells (lane 4) served as control. The purity of the hLAMP-2 GST-fusion protein used for all the inhibition experiments was confirmed by SDS-PAGE, (lane 7, Coomassie stain) and immunoblotting with hLAMP-2 specific IgG (lane 8).

(c) Sera of rats passively immunized with rabbit IgG to hLAMP-2 and culled at 2h, 24h, 48h and 120h were assayed by standard hLAMP-2 ELISA. Sera from animals injected with saline and normal rabbit IgG were used as controls. However antibodies to hLAMP-2 were detectable but at a lower concentration than after active immunization (see also **Supplementary Figure 3b**), and their values declined from 2h to 120h are evident.

(d) Purified human granulocytes were incubated for up to 60 minutes with 10 µg per ml of monoclonal antibodies to hLAMP-2 (H4B4), PR3 (1F11) or CD4: neutrophils treated with 10 ng per ml TNF-α were used as a positive controls. The supernatants were assayed for MPO concentrations using a standard ELISA. MPO is released into the supernatant in response to TNF-α and antibodies to hLAMP-2 and PR3 but is rapidly destroyed. The figure presents results from one experiment representative of three. The mean concentrations of MPO in the supernatants expressed as percentage of MPO released by TNF-α were: H4B4 - 83% (range: 80-85%); 1F11 - 57% (40-90%); CD4 -10% (0-21%). Results with both H4B4 and 1F11 were significantly different to control ( $P < 0.05$  Wilcoxon).

## Supplementary Figure 2: Cross-reactivity of autoantibodies to hLAMP-2 with FimH

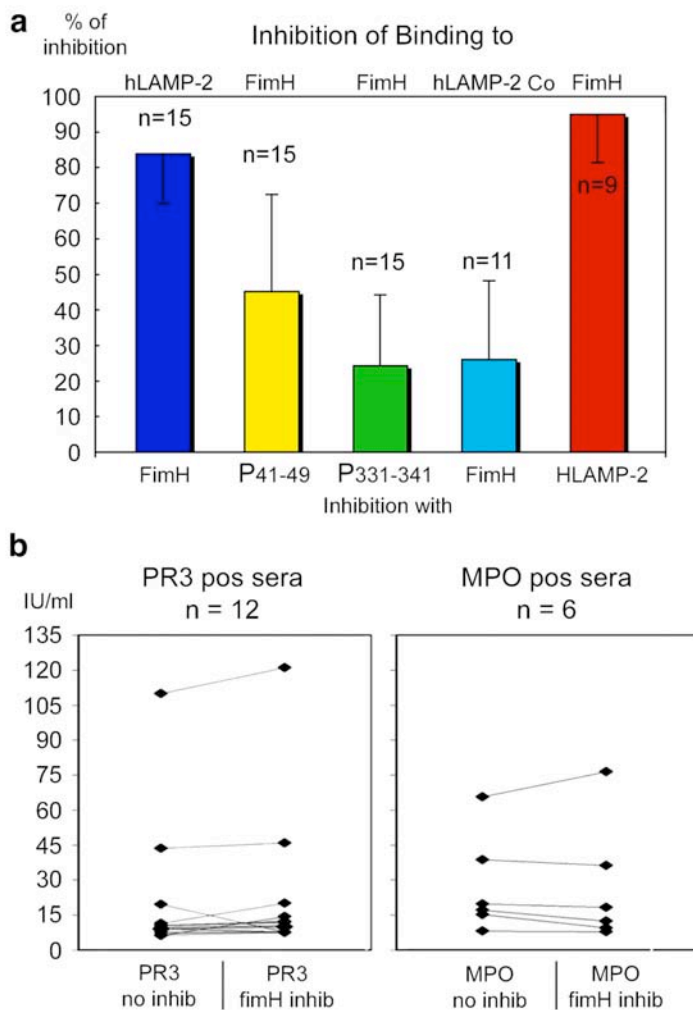

(a) 15 sera with hLAMP-2 specificity and 11 sera of healthy and hLAMP-2 negative disease controls were used to assess the relationship of antibodies to hLAMP-2 with fimH. Pre-incubation with fimH fusion protein specifically inhibited autoantibody binding to hLAMP-2 binding by 84% ( $\pm 13.9$ ). By contrast, fimH had no effect on hLAMP-2 binding in controls. Similarly, recombinant hLAMP-2 fusion protein inhibited patients' anti-hLAMP-2 positive sera from binding to fimH binding by 95% ( $\pm 13.5$ ). Binding to fimH was also inhibited by peptide P<sub>41-49</sub> (mean 45.1%  $\pm 27.1$ ) but not by peptide P<sub>331-341</sub> is not significant ( $P = 0.085$ ).

(b) The sera from 18 hLAMP-2 positive patients with pauci-immune FNGN also had autoantibodies to PR3 (n=12) or MPO (n=6). Pre-incubation with recombinant fimH did not inhibit binding of the autoantibodies to either of these ANCA antigens in specific ELISA.

**Supplementary Figure 3: Antibody levels and lung pathology in FimH immunized rats**

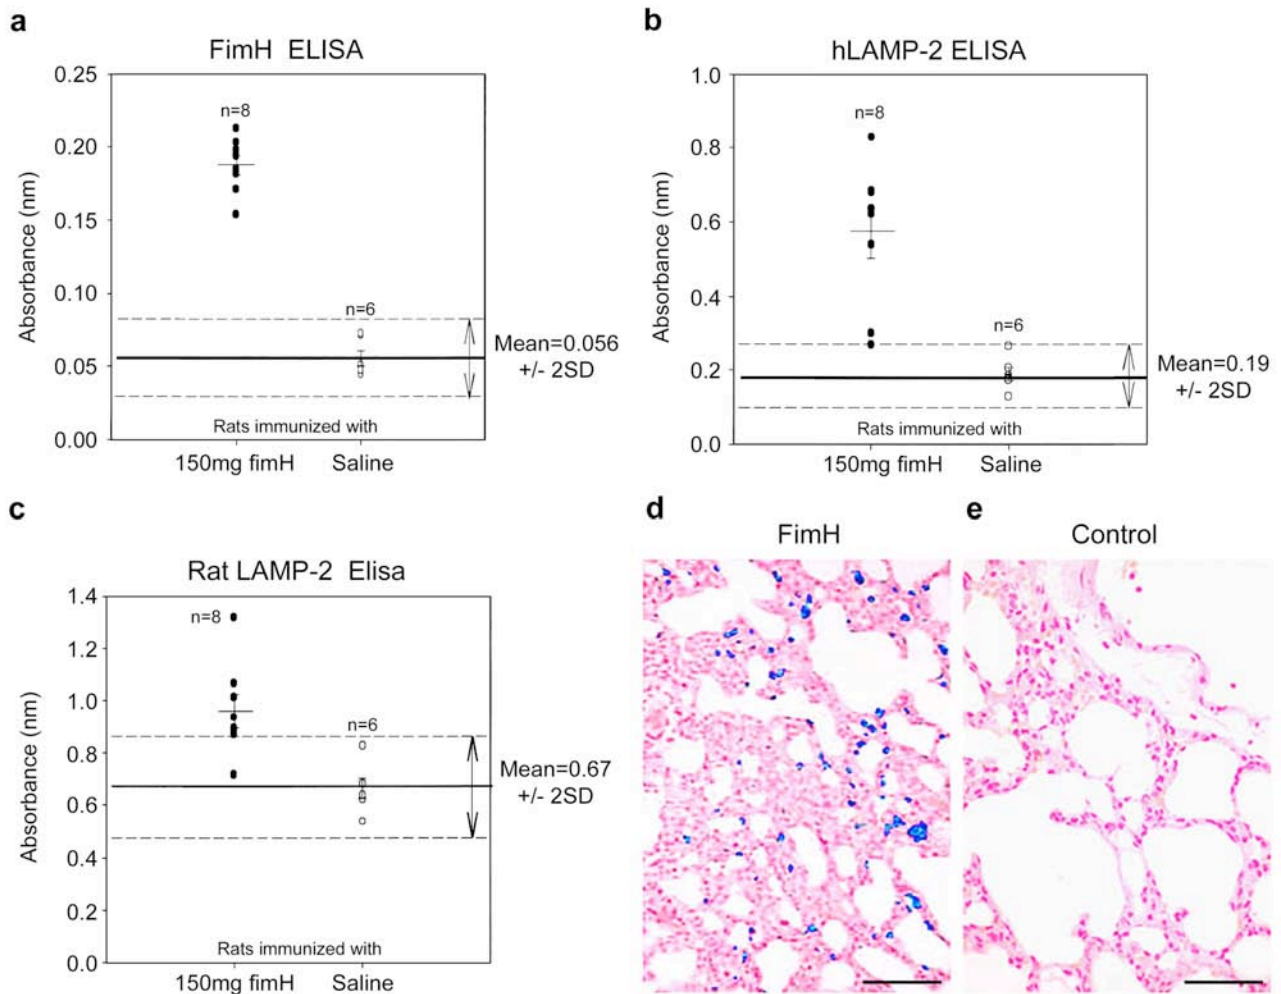

Eight rats were immunized with 150 micrograms of FimH using the protocol described in the methods and their sera taken at post mortem examination. The sera were assayed for antibodies to FimH (**a**), hLAMP-2 (**b**) and rat LAMP-2 (**c**) using specific ELISA. All the immunized rats developed antibodies to FimH. The antibodies cross-reacted with human and rat LAMP-2 in 7 of them. Lung histology revealed, in addition to neutrophilic capillaritis in one animal (see also Fig 4g), and haemosiderin deposition in a further rat (**d**), indicating protracted lung bleeding. (**e**) All control animals showed normal lung histology (Prussian blue reaction; Scale-bars d-e, 50  $\mu$ m).

#### Supplementary Figure 4: Proposed mechanism of hLAMP-2 induced injury

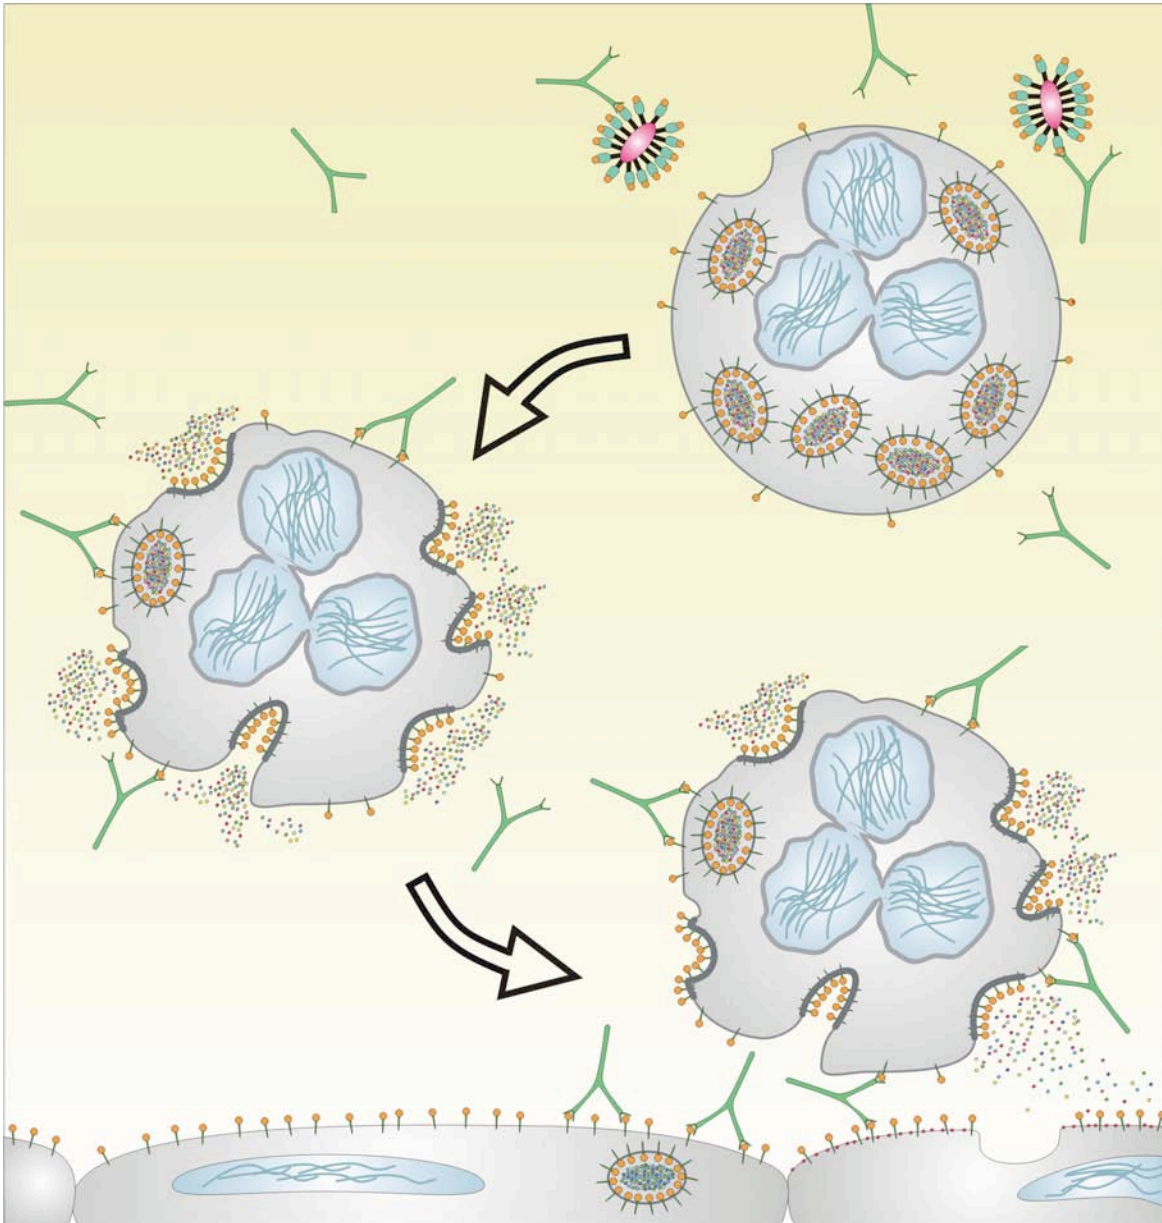

In susceptible individuals, natural exposure to fimH during infection induces synthesis of antibodies to an epitope shared by fimH (P<sub>72-80</sub>) and hLAMP-2 (P<sub>41-49</sub>) and that these antibodies react with both antigens (1). We propose that the cross-reacting antibodies are pathogenic and cause vasculitis in three ways: first by binding to hLAMP-2 on the granulocyte surface and activating neutrophils and triggering degranulation of lysosomal contents, similar to mechanisms described for canonical ANCA targets<sup>23,24</sup> (2), second by binding to hLAMP-2 on endothelial cells which they both activate and kill by inducing apoptosis; and third by cross-linking hLAMP-2 on the cell surface of granulocytes and microvascular endothelial cells and so promoting adherence (3) - the critical step in the pathogenesis of FNGN and vasculitis more generally.

## Supplementary Table 1: Alignment of epitopes P<sub>41-49</sub> and P<sub>331-341</sub> with PR3 sequences

**A**

|                      |            |            |            |            |            |            |            |            |            |            |       |       |          |
|----------------------|------------|------------|------------|------------|------------|------------|------------|------------|------------|------------|-------|-------|----------|
|                      | 1          |            |            |            |            | 50         |            |            |            |            |       |       | 100      |
| <b>PR3;NP 002777</b> | MAHRPPSPAL | ASVLLALLLS | GAARAAEIVG | GHEAQPHSRP | YMASLQMRGN | PGSHFCGGTL | IHPSFVLTA  | HCLRDIPQRL | VNVVLGAHNV | RTQEP      | QQHF  |       |          |
| <b>PR3;P24158</b>    | MAHRPPSPAL | ASVLLALLLS | GAARAAEIVG | GHEAQPHSRP | YMASLQMRGN | PGSHFCGGTL | IHPSFVLTA  | HCLRDIPQRL | VNVVLGAHNV | RTQEP      | QQHF  |       |          |
| P41-49               | .....      | .....      | .....      | .....      | .....      | .....      | .....      | .....      | .....      | .....      | ..... | ..... | .....    |
| P331-341             | .....      | .....      | .....      | .....      | .....      | .....      | .....      | .....      | .....      | .....      | ..... | ..... | .....QGY |
|                      |            |            |            |            |            |            |            |            |            |            |       |       |          |
|                      | 101        |            |            |            |            | 150        |            |            |            |            |       |       | 200      |
| <b>PR3;NP 002777</b> | SVAQVFLNNY | DAENKLNVDL | LIQLSSPANL | SASVATVQLP | QQDQVPVHGT | QCLAMGWGRV | GAHDPPAQVL | QELNVTVVTF | FCRPHNICTF | VPRRKAGICF |       |       |          |
| <b>PR3;P24158</b>    | SVAQVFLNNY | DAENKLNVDL | LIQLSSPANL | SASVATVQLP | QQDQVPVHGT | QCLAMGWGRV | GAHDPPAQVL | QELNVTVVTF | FCRPHNICTF | VPRRKAGICF |       |       |          |
| P41-49               | .....      | .....      | .....      | .....      | .....HGT   | VTYNGS     | .....      | .....      | .....      | .....      | ..... | ..... | .....    |
| P331-341             | STAQDCS    | .....      | .....      | .....      | .....      | .....      | .....      | .....      | .....      | .....      | ..... | ..... | .....    |
|                      |            |            |            |            |            |            |            |            |            |            |       |       |          |
|                      | 201        |            |            |            |            | 250        |            |            |            |            |       |       |          |
| <b>PR3;NP 002777</b> | GDSGGPLICD | GIIQGIDSFV | IWGCATRLFP | DDFTRVALYV | DWIRSTLRRV | EAKGRP     |            |            |            |            |       |       |          |
| <b>PR3;P24158</b>    | GDSGGPLICD | GIIQGIDSFV | IWGCATRLFP | DDFTRVALYV | DWIRSTLRRV | EAKGRP     |            |            |            |            |       |       |          |
| P41-49               | .....      | .....      | .....      | .....      | .....      | .....      | .....      | .....      | .....      | .....      | ..... | ..... | .....    |
| P331-341             | .....      | .....      | .....      | .....      | .....      | .....      | .....      | .....      | .....      | .....      | ..... | ..... | .....    |

**B**

|                         |                         |                        |            |            |             |            |            |            |            |            |          |       |       |
|-------------------------|-------------------------|------------------------|------------|------------|-------------|------------|------------|------------|------------|------------|----------|-------|-------|
|                         | 1                       |                        |            |            |             | 50         |            |            |            |            |          |       | 100   |
| <b>cPR3-1;NP 002777</b> | TRAA <del>S</del> VQRSA | <del>S</del> RVWSQARGP | QRCGRGGSG  | AALGLHTAQR | RTDPVHVEGY  | PREEVREKAG | GTSPDHEGVY | SLDDAITDQG | AT*VSEADAG | LAARDESANV |          |       |       |
| <b>cPR3-2;P24158</b>    | .....                   | .....                  | .....      | .....      | .....PGGETE | AQHEATQLRG | GRGTLAAALL | PSWQPGARGG | GTVTYEADAG | LAARDESANV |          |       |       |
| P41-49                  | .....                   | .....                  | .....      | .....      | .....       | .....      | .....      | .....      | .....      | .....      | .....    | ..... | ..... |
| P331-341                | .....                   | .....                  | .....      | .....      | .....       | .....      | .....      | .....      | .....H     | GTVTYNGS   | .....    | ..... | ..... |
|                         |                         |                        |            |            |             |            |            |            |            |            |          |       |       |
|                         | 101                     |                        |            |            |             | 150        |            |            |            |            |          |       | 200   |
| <b>cPR3-1;NP 002777</b> | MWPAEEGHHG              | DIELLQDLGW             | GVVGTHAAPA | HGQALGAVGH | WLVLLWQLD*  | GDGRTEVGWA | AQLDEENVVQ | FVLRVVVVQK | HLSHREVLLG | GLLRPHVVGS |          |       |       |
| <b>cPR3-2;P24158</b>    | MWPAEEGDHG              | DIELLQDLGW             | GVVGTHAAPA | HGQALGAVGH | WLVLLWQLDC  | GDGGTEVGWA | AQLGQKAGGG | ETLLPGHGGR | PCRPPPTTPT | PTTSKRRCGR |          |       |       |
| P41-49                  | .....                   | .....                  | .....      | .....      | .....       | .....      | .....      | .....      | .....      | .....      | .....    | ..... | ..... |
| P331-341                | .....QG                 | KYSTAQDCS              | .....      | .....      | .....       | .....      | .....      | .....      | .....      | .....      | .....    | ..... | ..... |
|                         |                         |                        |            |            |             |            |            |            |            |            |          |       |       |
|                         | 201                     |                        |            |            |             | 250        |            |            |            |            |          |       | 300   |
| <b>cPR3-1;NP 002777</b> | EHHVHQALGY              | VPQAVRGRQH             | EAGVDQGASA | EVAARVPHL  | QGGHVGPVW   | LRLVPAHDLR | SSGSTAQQQG | QQHGRQGRAG | GPVSHGGVQG | APTIKLLL*P |          |       |       |
| <b>cPR3-2;P24158</b>    | SLRLGPTTFF              | VPFVTIVFIH             | FLSFFLSFEM | ESCSATQAGM | QWR         | .....      | .....      | .....      | .....      | .....      | .....    | ..... | ..... |
| P41-49                  | .....                   | .....                  | .....      | .....      | .....       | .....      | .....      | .....      | .....      | .....      | .....    | ..... | ..... |
| P331-341                | .....                   | .....                  | .....      | .....      | .....       | .....      | .....Q     | GKYSTAQDCS | .....      | .....H     | GTVTYNGS | ..... | ..... |

HLAMP-2 peptide epitopes P<sub>41-41</sub> and P<sub>331-341</sub> were aligned with protein sequences of PR3 (A) and its complementary read cPR3 (B) published at Entrez [The National Center for Biotechnology Information (NCBI)]. The sequence in the upper line (B) corresponds to cPR3 published by Pendergraft<sup>22</sup> (NP\_002777), the sequence in the lower line to a protein derived from the same complementary reading frame of an alternate PR3/myeloblastin sequence (P24158). There were no significant homologies to either PR3 or cPR3 nor any in the three possible reading frames of MPO or cMPO.

**Supplementary Table 2: Bacterial strains used in for Immunoblot and inhibition experiments**

| <b>Strain</b>                                                                 | <b>Type</b>           | <b>Host</b>                                      | <b>Source</b>                    |
|-------------------------------------------------------------------------------|-----------------------|--------------------------------------------------|----------------------------------|
| <i>E. coli</i> <b>23510</b> and 23522 (Migula)<br>Castellani and Chalmers     | O32:K.:H19            | Calf, piglets and mice, facultative<br>in humans | ATCC 23510 and 23522             |
| <i>E. coli</i> <b>12900</b>                                                   | O157:H7, nontoxigenic | Human, cattle                                    | ATCC 700728, NCTC 12900          |
| <i>Klebsiella pneumoniae</i> subsp.<br><i>pneumoniae</i> (Schroeter) Trevisan | type 54               | Human                                            | ATCC 12657 and 12658             |
| <b><i>Klebsiella pneumoniae</i></b>                                           | Wild type             | Human                                            | Isolated from sputum             |
| <b><i>Proteus vulgaris</i></b>                                                | Wild type             | Human                                            | Isolated from urine              |
| <b><i>Staphylococcus aureus</i></b>                                           | Wild type             | Human                                            | Isolated from tonsillary abscess |

Proteins of bacterial strains detailed were used to assess patients' antibody profiles by Western blot analysis and selected *E. coli*, *Klebsiella*, *Proteus* and *Staphylococcus aureus* strains (bold) were used in inhibition assays.



**Supplementary Table 3: Patients' characteristics**

|   | Patient       | Age/<br>gender | hLAMP-2                        |              | IF  | ANCA ELISA | Clinical diagnosis/<br>Renal biopsy | Patient        | Age/<br>gender | hLAMP-2                        |              | IF    | ANCA ELISA | Clinical diagnosis/<br>Renal biopsy |
|---|---------------|----------------|--------------------------------|--------------|-----|------------|-------------------------------------|----------------|----------------|--------------------------------|--------------|-------|------------|-------------------------------------|
|   |               |                | at<br>presentation/<br>relapse | at remission |     |            |                                     |                |                | at<br>presentation/<br>relapse | at remission |       |            |                                     |
| G | 1 <b>A</b> +  | 44 m           | + (on, rel)                    | neg          | c   | PR3        | WG, FNGN                            | 43 AQ          | 45 m           | + (on)                         | NA           | c     | PR3        | WG, FNGN                            |
|   | 2 <b>B</b>    | 56 m           | + (rel)                        | neg          | c   | PR3        | WG, FNGN                            | 44 AR          | 60 f           | + (on)                         | neg          | c     | PR3        | WG, FNGN                            |
| R | 3 <b>C</b>    | 66 m           | + (on)                         | NA           | c/p | MPO        | WG, FNGN                            | 45 AS          | 50 f           | + (on)                         | neg          | c     | PR3        | WG, FNGN                            |
| O | 4 <b>D</b>    | 75 f           | + (on, rel)                    | neg          | c/p | MPO        | MPA, FNGN                           | 46 AT          | 70 f           | + (on, rel)                    | neg          | c     | PR3        | WG, FNGN                            |
| U | 5 <b>E</b>    | 67 f           | + (on, rel)                    | neg          | c   | PR3        | WG, FNGN                            | 47 AU          | 78 m           | neg                            | neg          | p     | MPO        | MPA, FNGN                           |
| P | 6 <b>F</b>    | 46 m           | + (on, rel)                    | neg          | c   | PR3        | WG, FNGN                            | 48 AV          | 90 f           | + (on)                         | NA           | p     | MPO        | MPA, FNGN                           |
| B | 7 <b>G</b>    | 60 m           | + (rel)                        | neg          | c   | PR3        | WG, FNGN                            | 49 AW          | 46 m           | neg (ther)                     | NA           | c     | PR3        | WG, FNGN                            |
|   | 8 <b>H</b> +  | 43 f           | neg (plasma)                   | NA           | c/p | PR3/ MPO   | FNGN                                | 50 AX          | 59 m           | + (on)                         | neg          | p     | MPO        | MPA, FNGN                           |
|   | 9 <b>I</b>    | 66 f           | neg (plasma)                   | NA           | c   | PR3        | WG, FNGN                            | 51 AY          | 58 m           | + (on)                         | neg          | c     | PR3        | WG, FNGN                            |
|   | 10 <b>J</b>   | 44 m           | neg                            | neg          | c   | PR3        | WG, non renal                       | 52 AZ          | 37 m           | + (on)                         | neg          | c     | PR3        | WG, FNGN                            |
|   | 11 <b>K</b>   | 8 m            | + (rel)                        | neg          | neg | neg        | FNGN                                | 53 BA          | 69 f           | + (on)                         | neg          | p     | MPO        | MPA, FNGN                           |
|   | 12 <b>K</b>   | 48 m           | + (rel)                        | neg          | c/p | MPO        | MPA, FNGNre                         | 54BB           | 38 f           | + (on, rel)                    | neg          | c     | PR3        | WG, FNGN                            |
|   | 13 <b>M</b>   | 53 m           | + (rel)                        | neg          | c   | neg        | WG, FNGN                            | 55 BC          | 72 f           | + (on)                         | neg          | c     | PR3        | WG, FNGN                            |
|   | 14 <b>N</b>   | 25 f           | + (rel, TX)                    | neg          | c   | PR3        | WG, FNGN                            | 56 BD          | 41 f           | neg (ther)                     | NA           | p     | MPO        | MPA, FNGN                           |
|   | 15 <b>O</b> + | 65 f           | + (rel, TX)                    | neg          | c/p | MPO        | WG, FNGN                            | 57 BE          | 57 f           | + (on, rel)                    | neg (1x pos) | c     | PR3        | WG, FNGN                            |
|   | 16 <b>P</b>   | 48 f           | + (on, rel)                    | neg          | c   | neg        | FNGN                                | 58 BF          | 70 f           | + (on)                         | neg          | c     | PR3        | WG, FNGN                            |
|   | 17 <b>Q</b>   | 52 f           | + (rel)                        | neg          | c/p | MPO        | WG, FNGN                            | 59 BG          | 56 f           | + (on)                         | neg          | c/ANA | PR3        | WG, FNGN                            |
|   | 18 <b>R</b>   | 57 f           | + (rel, TX)                    | neg          | p   | MPO        | MPA, FNGNre                         | 60 BH          | 77 f           | + (on)                         | NA           | c     | PR3/MPO    | WG, FNGN                            |
|   | 19 <b>S</b>   | 80 f           | + (rel)                        | neg          | c   | neg        | FNGNre                              | 61 BI          | 30 m           | + (on)                         | neg          | p     | MPO        | MPA, FNGN                           |
|   | 20 <b>T</b>   | 74 f           | + (rel)                        | neg          | c/p | MPO/PR3    | WG, FNGN                            | 62 BJ          | 68 m           | + (rel)                        | neg          | c     | PR3        | WG, FNGN                            |
|   | 21 <b>U</b>   | 53 m           | ± (on)+ (rel)                  | neg          | c   | PR3        | FNGN                                | 63 BK          | 64 f           | + (on, rel)                    | neg          | c     | PR3        | WG, FNGN                            |
|   | 22 <b>V</b>   | 56 m           | + (rel, TX)                    | neg          | p   | neg        | FNGN                                | 64 BL          | 70 f           | + (on)                         | NA           | p     | MPO        | MPA, FNGN                           |
|   | 23 <b>W</b>   | 59 m           | + (on)                         | neg          | p   | MPO        | WG, FNGNre                          | 65 BM          | 65 f           | + (on, rel)                    | neg (2x pos) | c/p   | MPO        | FNGNre                              |
|   | 24 <b>X</b>   | 72 m           | + (on, rel)                    | pos          | p   | MPO        | CSS, FNGN                           | 66 <b>BN</b> + | 69 m           | + (on)                         | NA           | c/p   | MPO/PR3    | WG, FNGN                            |
|   | 25 <b>Y</b>   | 22 f           | + (rel)                        | neg          | c   | neg        | CSS, FNGNre                         | 67 <b>BO</b>   | 66 m           | + (on)                         | NA           | c/p   | MPO        | WG, FNGNre                          |
|   | 26 <b>Z</b>   | 58 m           | + (rel)                        | neg          | p   | MPO        | FNGNre                              | 68 BP          | 63 m           | + (rel)                        | NA           | c     | neg (AGBM) | WG, FNGN                            |
|   | 27 <b>AA</b>  | 50 m           | + (rel)                        | neg          | p   | MPO        | WG, FNGN                            | 69 BQ          | 73 f           | + (on)                         | NA           | p     | MPO        | MPA, FNGN                           |
|   | 28 <b>AB</b>  | 43 f           | + (rel, TX)                    | neg (2x pos) | p   | MPO        | FNGN                                | 70 BR          | 17 f           | + (rel)                        | NA           | neg   | neg        | FNGN                                |
|   | 29 <b>AC</b>  | 29 m           | + (on, rel)                    | pos          | c   | PR3        | MPA, FNGN                           | 71 BS          | 63 m           | + (rel)                        | NA           | c     | PR3        | WG, FNGNre                          |
|   | 30 <b>AD</b>  | 30 m           | + (rel)                        | neg          | c   | PR3        | WG, FNGNre                          | 72 BT          | 71 f           | + (on)                         | neg          | c     | PR3        | FNGN                                |
|   | 31 <b>AE</b>  | 52 f           | + (rel)                        | pos          | c/p | MPO/ PR3   | FNGN, vasc.                         | 73 BU          | 84 f           | + (on)                         | NA           | p     | MPO        | FNGNre                              |
|   | 32 <b>AF</b>  | 35 f           | ± (rel)                        | neg          | c/p | MPO/ PR3   | WG, FNGN                            | 74 <b>BV</b> + | 35 m           | + (rel)                        | neg          | c     | PR3        | WG, FNGN                            |
|   | 33 <b>AG</b>  | 54 m           | + (rel)                        | NA           | p   | MPO        | MPA, FNGN                           | 75 <b>BW</b> + | 52 f           | + (rel TX)                     | NA           | c/p   | MPO        | MPA, FNGNre                         |

|       |      |             |     |     |            |             |       |      |             |              |     |     |               |
|-------|------|-------------|-----|-----|------------|-------------|-------|------|-------------|--------------|-----|-----|---------------|
| 34 AH | 57 m | + (on)      | NA  | p   | MPO        | MPA, FNGN   | 76 BX | 70 m | + (rel)     | NA           | p   | neg | WG, FNGNre    |
| 35 AI | 65 f | + (on)      | NA  | p   | MPO        | MPA, FNGN   | 77 BY | 57 m | + (on, rel) | neg (1x pos) | c   | neg | FNGNre        |
| 36 AJ | 44 m | + (on)      | neg | c   | PR3        | WG, FNGN    | 78 BZ | 66 f | + (on)      | NA           | c   | PR3 | WG, FNGNre    |
| 37 AK | 58 f | + (on)      | NA  | p   | MPO        | WG, FNGNre  | 79 CA | 65 m | + (rel)     | NA           | c   | neg | MPA, FNGN     |
| 38 AL | 42 m | + (rel)     | neg | c   | PR3/ (MPO) | FNGNre      | 80 CB | 22 f | + (on, rel) | NA           | c   | PR3 | WG, FNGN      |
| 39 AM | 33 m | + (on,)     | neg | neg | neg        | FNGN        | 81 CC | 77 f | + (on)      | NA           | c/p | MPO | MPA, FNGN     |
| 40 AN | 65 f | + (on, rel) | neg | c   | PR3        | WG, FNGNre  | 82 CD | 44 f | + (on)      | NA           | p   | MPO | FNGN          |
| 41 AO | 63 f | + (on)      | NA  | p   | MPO        | MPA, FNGNre | 83 CE | 60 m | + (rel)     | neg          | p   | neg | MPA/PAN, vasc |
| 42 AP | 40 m | + (rel)     | neg | c/p | MPO        | WG, FNGNre  | 84 CF | 55 f | + (on)      | NA           | c   | neg | WG, FNGN      |

A cohort of 84 patients (44 female, 56.5±18.6 years; 40 male, 52±14.2 years) were included in this study. The prevalence of autoantibodies to hLAMP-2 was calculated from sera taken when the disease was active either at presentation or on relapse (rel, TX: serum from relapse in renal transplant). Serum was available from 54 of these patients when in remission that was defined as having no evidence of active vasculitis clinically for at least 2 months before the serum sample and three months thereafter. Sera from a subset of 32 patients (group B) were used in Western blot and immunofluorescence studies to determine hLAMP-2 specificity and glycosylation dependence of autoantibodies. Sera from eleven patients (designation in **bold**) were selected for SPOTs assay to determine epitope specificity of the autoantibodies to hLAMP-2. At least one serum from an active stage of disease and, where available, from remission, were assayed for the presence of ANCA and specificity for MPO and PR3. Clinical diagnoses, made according to the Chapel Hill criteria, were Wegener's granulomatosis (WG - 45 patients) including one patient with WG limited to the upper respiratory tract (WG - non renal); microscopic polyangiitis (MPA - 20) and Churg Strauss syndrome (CSS - 2). 17 patients had isolated focal necrotizing glomerulonephritis. Disease activity was determined clinically and presence of active renal disease (FNGN) or FNGN with signs of recurrent progression (FNGNre) were confirmed histologically. Tissue samples and serum from post mortem examination was available in 6 patients (+). Patient samples were taken for routine clinical management and their use conformed to legal regulations in Austria and the United Kingdom and was granted by the Research Ethics Committees of Grampian University Hospitals NHS Trust and the Medical University of Vienna. hLAMP-2 ELISA results: + = assay positive; neg = assay negative; NA: samples or data not available. ANCA IF: c = cANCA, p = pANCA. ANCA ELISA: sera assayed positive for myeloperoxidase (MPO) or proteinase 3 (PR3).
